# Supplementary material
Source: publisher figshare collection journal article supplement (https://asha.figshare.com/articles/dataset/_/13231985)
Supplement: Supplementary file 1 [file 1]

**Supplemental Material S1.** Hierarchical regression model of ABAS-II GAC and Composites for participants age 16 and younger ( $n = 20$ ) for Structural Language subscales.

|                            | GAC                                              |       | Conceptual                                          |       | Social                                         |       | Practical                                        |        |
|----------------------------|--------------------------------------------------|-------|-----------------------------------------------------|-------|------------------------------------------------|-------|--------------------------------------------------|--------|
| Step 1<br>(Age, sex, NVIQ) | $R^2\Delta = 0.56$ ;<br>$F\Delta(3,16) = 6.79^*$ |       | $R^2\Delta = 0.60$ ;<br>$F\Delta(3,16) = 7.92^{**}$ |       | $R^2\Delta = 0.13$ ;<br>$F\Delta(3,16) = 0.77$ |       | $R^2\Delta = 0.56$ ;<br>$F\Delta(3,16) = 6.77^*$ |        |
| Step 2<br>(All variables)  | $R^2\Delta = 0.19$ ;<br>$F\Delta(4,12) = 2.30$   |       | $R^2\Delta = 0.22$ ;<br>$F\Delta(4,12) = 3.73^*$    |       | $R^2\Delta = 0.11$ ;<br>$F\Delta(4,12) = 0.44$ |       | $R^2\Delta = 0.19$ ;<br>$F\Delta(4,12) = 2.31$   |        |
|                            | $\beta$                                          | $t$   | $\beta$                                             | $t$   | $\beta$                                        | $t$   | $\beta$                                          | $t$    |
| Age                        | 0.68                                             | 3.06* | 0.69                                                | 3.67* | 0.17                                           | 0.43  | 0.74                                             | 3.31** |
| Sex                        | 0.05                                             | 0.22  | 0.07                                                | 0.39  | -0.20                                          | -0.58 | 0.13                                             | 0.63   |
| NVIQ                       | 0.46                                             | 2.02  | 0.57                                                | 2.95  | -0.18                                          | -0.45 | 0.54                                             | 2.37*  |
| Speech                     | 1.26                                             | 2.61* | 1.24                                                | 3.01* | 0.53                                           | 0.63  | 1.30                                             | 2.71*  |
| Syntax                     | -0.77                                            | -1.77 | -0.66                                               | -1.77 | -0.80                                          | -1.04 | -0.67                                            | -1.54  |
| Semantics                  | -0.30                                            | -1.21 | -0.33                                               | -1.62 | 0.16                                           | 0.38  | -0.39                                            | -1.62  |
| Coherence                  | 0.18                                             | 0.79  | 0.21                                                | 1.09  | 0.27                                           | 0.66  | 0.07                                             | 0.32   |

*Note.* ABAS-II = Adaptive Behavior Assessment System–Second Edition (ABAS-II; Harrison & Oakland, 2003); GAC = General Adaptive Composite; NVIQ = nonverbal IQ.

<sup>a</sup>Raw scores. <sup>b</sup>Sex: 0 = female; 1 = male. <sup>c</sup>Reverse raw scores.

\* $p < .05$ . \*\* $p < .01$ . \*\*\* $p < .001$ .

## Reference

Harrison, P., & Oakland, T. (2003). *Adaptive Behavior Assessment System–Second Edition*. The Psychological Corporation.
