# Supplementary material
Source: publisher figshare collection journal article supplement (https://asha.figshare.com/articles/dataset/_/13231985)
Supplement: Supplementary file 2 [file 1]

**Supplemental Material S2.** Hierarchical regression model of ABAS-II GAC and composites for participants with no hearing loss ( $n = 20$ ) for structural language subscales.

|                        | <b>GAC<sub>a</sub></b>      |        | <b>Conceptual<sub>a</sub></b> |       | <b>Social<sub>a</sub></b> |        | <b>Practical<sub>a</sub></b>  |        |
|------------------------|-----------------------------|--------|-------------------------------|-------|---------------------------|--------|-------------------------------|--------|
| Step 1                 | $R^2\Delta = 0.61$ ;        |        | $R^2\Delta = 0.57$ ;          |       | $R^2\Delta = 0.37$ ;      |        | $R^2\Delta = 0.67$ ;          |        |
| (Age, sex, NVIQ)       | $F\Delta(3,16) = 8.31^{**}$ |        | $F\Delta(3,16) = 7.15^{**}$   |       | $F\Delta(3,16) = 3.09$    |        | $F\Delta(3,16) = 10.59^{***}$ |        |
| Step 2                 | $R^2\Delta = 0.18$ ;        |        | $R^2\Delta = 0.19$ ;          |       | $R^2\Delta = 0.20$ ;      |        | $R^2\Delta = 0.15$ ;          |        |
| (All variables)        | $F\Delta(4,12) = 2.44$      |        | $F\Delta(4,12) = 2.33$        |       | $F\Delta(4,12) = 1.40$    |        | $F\Delta(4,12) = 2.53$        |        |
|                        | $\beta$                     | $t$    | $\beta$                       | $t$   | $\beta$                   | $t$    | $\beta$                       | $t$    |
| Age                    | .60                         | 3.28** | 0.58                          | 2.96* | 0.28                      | 1.09   | 0.67                          | 3.94*  |
| Sex <sub>b</sub>       | -0.19                       | -1.14  | -0.13                         | -0.70 | -0.44                     | -1.86  | -0.12                         | -0.77  |
| NVIQ                   | 0.20                        | 1.16   | 0.25                          | 1.36  | -0.28                     | -1.15  | 0.33                          | 2.05   |
| Speech <sub>c</sub>    | 0.93                        | 2.94*  | 0.86                          | 2.59* | 0.81                      | 1.82   | 0.90                          | 3.09** |
| Syntax <sub>c</sub>    | -0.63                       | -2.04  | -0.42                         | -1.28 | -0.77                     | -1.74  | -0.65                         | -2.29* |
| Semantics <sub>c</sub> | -0.22                       | -0.94  | -0.19                         | -0.79 | 0.09                      | 0.26   | -.33                          | -1.54  |
| Coherence <sub>c</sub> | 0.15                        | 0.61   | 0.09                          | 0.34  | 0.00                      | -0.001 | 0.23                          | 1.03   |

Note. ABAS-II = Adaptive Behavior Assessment System–Second Edition (ABAS-II; Harrison & Oakland, 2003); GAC = General Adaptive Composite; NVIQ = nonverbal IQ.

<sup>a</sup>Raw scores. <sup>b</sup>Sex: 0 = female; 1 = male. <sup>c</sup>Reverse raw scores.

\* $p < .05$ . \*\* $p < .01$ . \*\*\* $p < .001$ .

## Reference

Harrison, P., & Oakland, T. (2003). *Adaptive Behavior Assessment System–Second Edition*. The Psychological Corporation.
